# Supplementary material for: The comparison of dexmedetomidine and midazolam used for sedation of patients undergoing upper gastrointestinal endoscopy
Source: Research Square preprint supplement (doi:10.21203/rs.3.rs-6261635/v1), 2025-05-07
Supplement: Supplementary file 1 [file d2de40e226dcde71df5accd6.docx]

**Appendix A Data Collecting Sheet**

**Tool 1: Demographic data:**

| **Demographic data** | |
| --- | --- |
| Initial letters of patient’s name |  |
| Case number |  |
| Sex, male/female |  |
| Age/years |  |
| Weight/kg |  |
| Height/cm |  |
| BMI |  |
| Ethanol use |  |
| Tobacco use |  |
| The highest completed level of education |  |
| Indications for gastrointestinal endoscopy   - Dysphagia - Esophageal reflux symptoms - Dyspepsi - Another |  |

**Tool 2: Time to full sedation and recovery:**

| **Time to full sedation and recovery** | |
| --- | --- |
| The time from the moment the medication is given to full sedation per min, RSS 4 (Time to full sedation) |  |
| Time from discontinue of medication to full recovery per min, RSS = 2 (Time to full recovery) |  |
| Patients fully recovered: 15 min, 30 min, 45 min |  |
| Duration of endoscopy |  |

**Tool 3: follow up sheet**

| **Item:** | **Point1** | **Point2** | **Point3** | **Poin4** |
| --- | --- | --- | --- | --- |
| **Patient follow up:** | | | | |
| Heart rate, beats/min |  |  |  |  |
| Mean arterial pressure, mmHg |  |  |  |  |
| Systolic, mmHg |  |  |  |  |
| Diastolic, mmHg |  |  |  |  |
| Pulse oximetry, SpO2 |  |  |  |  |
| Respiratory rate |  |  |  |  |
| Total dose of Midazolam/mg  (at the end of research written by anesthasoligist) | ***** | ***** | ***** |  |
| Total dose of Dexmedetomidin / µg  (at the end of research written by anesthasoligist) | ***** | ***** | ***** |  |
| Total dose of Fentanyl / µg  (at the end of research written by anesthasoligist) | ***** | ***** | ***** |  |
| Total dose of Atropine/mg  (at the end of research written by anesthasoligist) | ***** | ***** | ***** |  |
| Total dose of Ephedrine/mg  (at the end of research written by anesthasoligist) | ***** | ***** | ***** |  |
| PARS 0-10 | ***** | ***** | ***** |  |
| **Patient satisfaction:** | | | | |
| Satisfaction (0 = none, 10 = intolerable) Visual analog scale VAS |  | ***** | ***** |  |
| Discomfort (0 = none, 10 = intolerable) VAS |  | ***** | ***** |  |
| Anxiety (0 = none, 10 = severe) VAS |  | ***** | ***** |  |
| Gagging (0 = none, 10 = severe) VAS |  | ***** | ***** |  |
| **Item:** | **Point1** | **Point2** | **Point3** | **Poin4** |
| **Adverse effects:** | | | | |
| Hypertension |  |  |  |  |
| Hypotension |  |  |  |  |
| Tachycardia |  |  |  |  |
| Bradycardia |  |  |  |  |
| Hypoxia |  |  |  |  |
| Tachypnea |  |  |  |  |
| Bradypnea |  |  |  |  |
| Apnea |  |  |  |  |
| Coughing |  |  |  |  |
| Vomiting/retching |  |  |  |  |
| Nausea |  |  |  |  |
| Allergies |  |  |  |  |
| Abnormal body movements |  |  |  |  |
| **Endoscopist follow up (satisfaction):** | | | | |
| Patient discomfort (0 = none, 10 = severe) VAS | ***** | ***** | ***** |  |
| Gagging (0 = none, 10 = severe) VAS | ***** | ***** | ***** |  |
| Retching (0 = none, 10 = severe) VAS | ***** | ***** | ***** |  |
| Satisfaction of patient’s sedation level (0 = very dissatisfied, 10 = very satisfied) VAS | ***** | ***** | ***** |  |
| Technical difficulty (0 = easy, 10 = very demanding) VAS | ***** | ***** | ***** |  |

*** There is no need for documentation**

**Time-points:**

- Point 1. Before sedation.
- Point 2. Full sedation before endoscopy.
- Point 3. Significant value after beginning of endoscopy or 5 min afterbeginning of endoscopy if no significant value*.
- Point 4. After completion of endoscopy and discontinuance of drugs, (During one hour after examination in 15 minutes interval to take significant value*)

*significant value: bradycardia, tachycardia, hypotension, hypertension, desaturation, bradypnea, tachypnea, apnea, pain, gagging, anxiety, allergies, nausea, vomiting/retching, coughing and abnormal body movements.
